# Supplementary material
Source: PubMed Central journal article supplement (PMC3386316)
Supplement: NIHMS308688-supplement-Supp.pdf [file NIHMS308688-supplement-Supp.pdf]

**Supplementary Table 1. Association of *LCE3C\_LCE3B-del* genotypes with psoriasis.**

| Dataset     | Status    | <i>LCE3C_LCE3B-del/LCE3C_LCE3B-del</i> | <i>LCE3C_LCE3B-del/Intact</i> | Intact/Intact | OR <sup>a</sup> (95%CI)       | P-value               |
|-------------|-----------|----------------------------------------|-------------------------------|---------------|-------------------------------|-----------------------|
| Spain       | Control   | 107 (28.0)                             | 206 (53.9)                    | 69 (18.1)     | 1.56 (1.19-2.08)              | 0.001428              |
|             | Psoriasis | 66 (37.5)                              | 95 (54.0)                     | 15 (8.5)      |                               |                       |
| Italy       | Control   | 159 (35.3)                             | 198 (44.0)                    | 93 (20.7)     | 1.28 (1.06-1.54)              | 0.007877              |
|             | Psoriasis | 186 (41.3)                             | 201 (44.7)                    | 63 (14.0)     |                               |                       |
| France      | Control   | 73 (44.5)                              | 65 (39.6)                     | 26 (15.9)     | 1.27 (0.91-1.75)              | 0.155320              |
|             | Psoriasis | 68 (48.2)                              | 60 (40.6)                     | 13 (9.2)      |                               |                       |
| Netherlands | Control   | 102 (36.4)                             | 130 (46.4)                    | 48 (17.1)     | 1.49 (1.14-1.96)              | 0.003253              |
|             | Psoriasis | 95 (46.6)                              | 91 (44.6)                     | 18 (8.8)      |                               |                       |
| Germany     | Control   | 391 (41.8)                             | 433 (46.3)                    | 112 (12.0)    | 1.30 (1.15-1.50)              | 3.329e-05             |
|             | Psoriasis | 678 (50.5)                             | 543 (40.5)                    | 121 (9.0)     |                               |                       |
| UK          | Control   | 460 (45.1)                             | 450 (44.1)                    | 111 (10.9)    | 1.16 (1.02-1.33)              | 0.02847               |
|             | Psoriasis | 454 (48.2)                             | 415 (44.1)                    | 72 (7.7)      |                               |                       |
| Ireland     | Control   | 463 (48.9)                             | 385 (40.7)                    | 99 (10.5)     | 1.06 (0.89-1.28)              | 0.4655                |
|             | Psoriasis | 195 (49.7)                             | 164 (41.8)                    | 33 (8.4)      |                               |                       |
| Finland     | Control   | 150 (44.8)                             | 136 (40.6)                    | 49 (14.6)     | 1.33 (0.99-1.79)              | 0.05466               |
|             | Psoriasis | 72 (53.3)                              | 50 (37.0)                     | 13 (9.6)      |                               |                       |
| US CA       | Control   | 113 (38.4)                             | 152 (51.7)                    | 29 (9.9)      | 1.41 (1.12-1.75)              | 0.002496              |
|             | Psoriasis | 292 (49.0)                             | 263 (44.1)                    | 41 (6.9)      |                               |                       |
| US MI       | Control   | 809 (42.3)                             | 860 (45.0)                    | 244 (12.8)    | 1.10 (1.00-1.21)              | 0.05790               |
|             | Psoriasis | 936 (44.1)                             | 963 (45.4)                    | 224 (10.6)    |                               |                       |
| Overall     | Control   | 2827 (42.0)                            | 3015 (44.9)                   | 880 (13.1)    | 1.20 (1.15-1.28) <sup>b</sup> | 1.42e-13 <sup>b</sup> |
|             | Psoriasis | 3042 (46.8)                            | 2845 (43.8)                   | 613 (9.4)     |                               |                       |
| Japan       | Control   | 187 (34.8)                             | 257 (47.9)                    | 93 (17.3)     | 1.18 (0.99-1.39)              | 0.06578               |
|             | Psoriasis | 216 (39.3)                             | 257 (46.7)                    | 77 (14.0)     |                               |                       |
| Mongolia    | Control   | 44 (26.2)                              | 78 (46.4)                     | 46 (27.4)     | 2.04 (1.41-2.94)              | 9.38e-05              |
|             | Psoriasis | 44 (44.0)                              | 46 (46.0)                     | 10 (10.0)     |                               |                       |
| China       | Control   | 624 (32.9)                             | 926 (48.8)                    | 347 (18.3)    | 1.28 (1.16-1.41)              | 1.41e-07              |
|             | Psoriasis | 781 (39.1)                             | 956 (47.9)                    | 258 (12.9)    |                               |                       |

<sup>a</sup>ORs and P-values are derived from the log-additive model, with homozygotes for the deleted allele (*LCE3C\_LCE3B-del*) at higher risk for psoriasis. Overall values for the European ancestry populations adjusted by population according to a logistic model in which population was introduced as a confounding variable (based on fixed effects model<sup>b</sup> and a random effects model<sup>c</sup>) after no significant evidence of heterogeneity based on allelic frequencies was detected by population.

**Supplementary Table 2. Association of rs4112788 genotypes with psoriasis.**

| Dataset     | Status    | C/C (%)     | C/T (%)     | T/T (%)    | OR <sup>a</sup> (95%CI)       | P-value               |
|-------------|-----------|-------------|-------------|------------|-------------------------------|-----------------------|
| Spain       | Control   | 117 (30.6)  | 193 (50.5)  | 72 (18.8)  | 1.61 (1.23-2.13)              | 4.92e-04              |
|             | Psoriasis | 72 (41.1)   | 89 (50.9)   | 14 (8.0)   |                               |                       |
| Italy       | Control   | 155 (34.8)  | 200 (44.8)  | 91 (20.4)  | 1.37 (1.14-1.64)              | 0.00101               |
|             | Psoriasis | 189 (42.1)  | 205 (45.7)  | 55 (12.2)  |                               |                       |
| France      | Control   | 76 (45.8)   | 64 (38.6)   | 26 (15.7)  | 1.27 (0.91-1.75)              | 0.15532               |
|             | Psoriasis | 71 (49.7)   | 60 (42.0)   | 12 (8.4)   |                               |                       |
| Netherlands | Control   | 102 (36.7)  | 129 (46.4)  | 47 (16.9)  | 1.47 (1.12-1.92)              | 0.00461               |
|             | Psoriasis | 94 (46.5)   | 90 (44.6)   | 18 (8.9)   |                               |                       |
| Germany     | Control   | 368 (41.4)  | 415 (46.7)  | 106 (11.9) | 1.22 (1.08-1.39)              | 0.00208               |
|             | Psoriasis | 616 (47.3)  | 567 (43.6)  | 118 (9.1)  |                               |                       |
| UK          | Control   | 437 (44.5)  | 429 (43.7)  | 115 (11.7) | 1.12 (0.98-1.28)              | 0.08620               |
|             | Psoriasis | 472 (46.8)  | 446 (44.2)  | 90 (8.9)   |                               |                       |
| Ireland     | Control   | 466 (48.0)  | 403 (41.5)  | 101 (10.4) | 1.18 (0.99-1.41)              | 0.06980               |
|             | Psoriasis | 222 (51.4)  | 180 (41.7)  | 30 (6.9)   |                               |                       |
| Finland     | Control   | 149 (45.2)  | 135 (40.9)  | 46 (13.9)  | 1.33 (0.98-1.79)              | 0.06015               |
|             | Psoriasis | 71 (54.6)   | 46 (35.4)   | 13 (10.0)  |                               |                       |
| US-CA       | Control   | 115 (38.9)  | 149 (50.3)  | 32 (10.8)  | 1.41 (1.14-1.75)              | 0.00229               |
|             | Psoriasis | 286 (48.6)  | 263 (44.7)  | 40 (6.8)   |                               |                       |
| US- MI      | Control   | 811 (42.6)  | 850 (44.7)  | 241 (12.7) | 1.10 (1.00-1.21)              | 0.05152               |
|             | Psoriasis | 940 (44.6)  | 948 (45.0)  | 221 (10.5) |                               |                       |
| Overall     | Control   | 2795 (42.1) | 2967 (44.7) | 878 (13.2) | 1.20 (1.15-1.27) <sup>b</sup> | 1.81e-12 <sup>b</sup> |
|             | Psoriasis | 3033 (46.4) | 2894 (44.3) | 611 (9.3)  |                               |                       |
| China       | Control   | 625 (33.1)  | 923 (48.9)  | 339 (18.0) | 1.35 (1.22-1.47)              | 3.62e-10              |
|             | Psoriasis | 794 (40.2)  | 955 (48.4)  | 224 (11.4) |                               |                       |

<sup>a</sup>ORs and P-values are derived from the log-additive model, with homozygotes C/C at higher risk for psoriasis. Overall values for the European ancestry populations were adjusted by population according to a logistic model in which population was introduced as a confounding variable (based on a fixed effects model<sup>b</sup> and a random effects model<sup>c</sup>) after no significant evidence of heterogeneity based on allelic frequencies was detected by population.

**Supplementary Table 3. Genetic interaction analysis between rs130076 in *PSORS1* and *LCE3C\_LCE3B-del* and its tag SNP.**

| Dataset | rs130076                           |           |            | Group | Epistasis <sup>a</sup> rs4112788-rs130076 |           |         | <i>LCE3C_LCE3B</i> -rs130076 |           |         |
|---------|------------------------------------|-----------|------------|-------|-------------------------------------------|-----------|---------|------------------------------|-----------|---------|
|         | C/C (- group) vs. C/T+T/T (+group) | OR        | 95%CI      |       | P-value                                   | OR        | 95%CI   | P-value                      | OR        | 95%CI   |
| Spain   | 3.40                               | 2.34-4.94 | 7.783 e-11 | +     | 1.90                                      | 1.22-2.96 | 0.0829  | 1.71                         | 1.09-2.68 | 0.23312 |
|         |                                    |           |            | -     | 1.14                                      | 0.78-1.66 |         | 1.19                         | 0.81-1.75 |         |
| Italy   | 2.05                               | 1.56-2.69 | 2.372 e-07 | +     | 1.14                                      | 0.85-1.54 | 0.1606  | 1.06                         | 0.79-1.43 | 0.128   |
|         |                                    |           |            | -     | 1.51                                      | 1.17-1.95 |         | 1.44                         | 1.11-1.85 |         |
| Germany | 4.37                               | 3.65-5.22 | 7.59 e-62  | +     | 1.26                                      | 1.03-1.54 | 0.4822  | 1.33                         | 1.09-1.33 | 0.52565 |
|         |                                    |           |            | -     | 1.39                                      | 1.15-1.69 |         | 1.22                         | 1.01-1.47 |         |
| France  | 5.58                               | 3.41-9.12 | 7.081 e-13 | +     | 1.55                                      | 0.93-2.52 | 0.55451 | 1.64                         | 0.96-2.54 | 0.27597 |
|         |                                    |           |            | -     | 1.25                                      | 0.72-2.17 |         | 1.10                         | 0.64-1.88 |         |
| Ireland | 1.91                               | 1.51-2.42 | 4.541 e-08 | +     | 1.12                                      | 0.89-1.40 | 0.7500  | 1.03                         | 0.82-1.29 | 0.68030 |
|         |                                    |           |            | -     | 1.19                                      | 0.88-1.59 |         | 1.11                         | 0.82-1.50 |         |
| Finland | 2.50                               | 1.65-3.80 | 1.444 e-05 | +     | 1.25                                      | 0.81-1.94 | 0.750   | 1.21                         | 0.78-1.87 | 0.756   |
|         |                                    |           |            | -     | 1.39                                      | 0.89-2.16 |         | 1.34                         | 0.89-2.14 |         |
| US-CA   | 2.72                               | 1.97-3.74 | 4.209 e-10 | +     | 1.24                                      | 0.84-1.83 | 0.8889  | 1.10                         | 0.74-1.63 | 0.345   |
|         |                                    |           |            | -     | 1.28                                      | 0.93-1.77 |         | 1.41                         | 1.02-1.95 |         |
| China   | 18.73                              | 15.9-22.0 | <2e-16     | +     | 1.40                                      | 1.19-1.65 | 0.467   | 1.27                         | 1.08-1.49 | 0.7102  |
|         |                                    |           |            | -     | 1.28                                      | 1.07-1.53 |         | 1.33                         | 1.12-1.59 |         |

OR and 95% CI interval for psoriasis of rs130076 under a dominant model of heritability for allele T, which is referred as positive (+) group: C/T+T/T; negative (-) group: C/C. <sup>a</sup>Epistasis analysis performed by logistic regression models which included an interaction term, (rs4112788-rs130076 or *LCE3C\_LCE3B*-rs130076); P-values and OR are derived from the log-likelihood ratio test between the model including both additive effects plus the interaction term against the model that only includes additive effects. Overall values for European ancestry populations are not presented since the Woolf-test on homogeneity of OR based on allelic frequencies of rs130076 showed statistical significant heterogeneity among them (P = 1.851e-08).

**Supplementary Table 4. Association of rs130076 in the *PSORS1* locus in individuals from different populations.**

| Dataset | Status (alleles) | rs130076 C (%) | rs130076 T (%) | HWE      | OR (95%CI)<br>T vs. C | P-value  |
|---------|------------------|----------------|----------------|----------|-----------------------|----------|
| Spain   | Control          | 651 (85.2)     | 113 (14.8)     | 0.54     | 2.58 (1.91-3.49)      | 6.82e-10 |
|         | Psoriasis        | 243 (69.0)     | 109 (31)       | 0.05     |                       |          |
| Italy   | Control          | 718 (81.0)     | 168 (19.0)     | 0.54     | 1.79 (1.43-2.24)      | 3.56e-07 |
|         | Psoriasis        | 595 (70.5)     | 249 (29.5)     | 0.41     |                       |          |
| Germany | Control          | 1478 (80.6)    | 356 (19.4)     | 0.83     | 3.01 (2.62-3.46)      | <2e-16   |
|         | Psoriasis        | 1537 (58.0)    | 1115 (42.0)    | 4.19e-09 |                       |          |
| France  | Control          | 277 (82.4)     | 59 (17.6)      | 0.30     | 3.52 (2.44-5.09)      | 1.88e-11 |
|         | Psoriasis        | 160 (57.1)     | 120 (42.9)     | 0.06     |                       |          |
| Ireland | Control          | 1368 (70.4)    | 574 (29.5)     | 1        | 1.55 (1.31-1.83)      | 3.50e-07 |
|         | Psoriasis        | 524 (60.6)     | 340 (39.4)     | 0.02     |                       |          |
| Finland | Control          | 533 (82.3)     | 115 (17.7)     | 0.45     | 2.02 (1.45-2.82)      | 3.26e-05 |
|         | Psoriasis        | 181 (69.6)     | 79 (30.4)      | 0.30     |                       |          |
| US-CA   | Control          | 362 (80.8)     | 86 (19.2)      | 0.40     | 2.25 (1.72-2.93)      | 1.95e-09 |
|         | Psoriasis        | 759 (65.2)     | 405 (34.8)     | 0.006    |                       |          |
| China   | Control          | 3317 (89.0)    | 409 (11.0)     | 0.72     | 6.43 (5.70-7.25)      | <2e-16   |
|         | Psoriasis        | 2178 (55.8)    | 1726 (44.2)    | 2.9e-153 |                       |          |

Overall values for European ancestry populations are not presented since the Woolf-test on homogeneity of odds ratios based on allelic frequencies of rs130076 showed statistical significant heterogeneity among them (P = 1.851e-08).
